# Supplementary material for: Troponin Cut-Offs for Acute Myocardial Infarction in Patients with Impaired Renal Function—A Systematic Review and Meta-Analysis
Source: MDPI journal article supplement (doi:10.3390/diagnostics12020276), 2022-01-21
Supplement: s1 [file s1]

## Search Strategy

**EMBASE (21.01.2020, 1841 hits)**

**Exp Troponin/** OR (Troponin\* OR Troponin Complex\* OR TnT OR TnI OR Cardiac troponin\* OR cTroponin\* OR cTnT OR cTnI OR High sensitive troponin\* OR Hs-TnT OR Hs-TnI OR Hs-Troponin\* OR Hs-cTn\*)

AND

**Exp Chronic Kidney Failure/** OR (Chronic Renal Insufficienc\* OR Chronic Kidney Insufficienc\* OR Chronic Kidney Disease\* OR CKD OR Chronic Renal Disease\* OR Chronic Kidney Failure\* OR Chronic Renal Failure\* OR End-stage Kidney Disease\* OR End Stage Kidney Disease\* OR End-Stage Renal Disease\* OR End Stage Renal Disease\* OR ESRD OR Chronic Kidney Disorder\* OR Chronic Nephropathy OR (Chronic Kidney Disease-mineral and bone disorder\*) OR CKD-MBD OR (CKD-mineral and bone disorder\*))

Embase Classic\*Embase 1947 to 2020 January 20

Enter keyword or phrase (\* or \$ for truncation)

☒ Keyword ☐ Author ☐ Title ☐ Journal

☐ Limits (expand) ☐ Include Multimedia ☒ Map Term to Subject Heading

| # | Searches                                                                                                                                                                                                                                                                                                                                                                                                                                                                                                                                                                                                                                                      | Results | Type     | Actions                                              | Annotations |
|---|---------------------------------------------------------------------------------------------------------------------------------------------------------------------------------------------------------------------------------------------------------------------------------------------------------------------------------------------------------------------------------------------------------------------------------------------------------------------------------------------------------------------------------------------------------------------------------------------------------------------------------------------------------------|---------|----------|------------------------------------------------------|-------------|
| 1 | exp troponin/                                                                                                                                                                                                                                                                                                                                                                                                                                                                                                                                                                                                                                                 | 57504   | Advanced | <a href="#">Display Results</a> <a href="#">More</a> |             |
| 2 | (Troponin* OR Troponin Complex* OR TnT or TnI or Cardiac troponin* or cTroponin* or cTnT or cTnI or High sensitive troponin* or Hs-TnT or Hs-TnI or Hs-Troponin* or Hs-cTn*) .mp. [mp=title, abstract, heading word, drug trade name, original title, device manufacturer, drug manufacturer, device trade name, keyword, floating subheading word, candidate term word]                                                                                                                                                                                                                                                                                      | 66708   | Advanced | <a href="#">Display Results</a> <a href="#">More</a> |             |
| 3 | 1 or 2                                                                                                                                                                                                                                                                                                                                                                                                                                                                                                                                                                                                                                                        | 66708   | Advanced | <a href="#">Display Results</a> <a href="#">More</a> |             |
| 4 | exp chronic kidney failure/                                                                                                                                                                                                                                                                                                                                                                                                                                                                                                                                                                                                                                   | 98135   | Advanced | <a href="#">Display Results</a> <a href="#">More</a> |             |
| 5 | (Chronic Renal Insufficienc* or Chronic Kidney Insufficienc* or Chronic Kidney Disease* or CKD or Chronic Renal Disease* or Chronic Kidney Failure* or Chronic Renal Failure* or End-stage Kidney Disease* or End Stage Kidney Disease* or End-Stage Renal Disease* or End Stage Renal Disease* or ESRD or Chronic Kidney Disorder* or Chronic Nephropathy or (Chronic Kidney Disease-mineral and bone disorder*) or CKD-MBD or (CKD-mineral and bone disorder*)) .mp. [mp=title, abstract, heading word, drug trade name, original title, device manufacturer, drug manufacturer, device trade name, keyword, floating subheading word, candidate term word] | 224358  | Advanced | <a href="#">Display Results</a> <a href="#">More</a> |             |
| 6 | 4 or 5                                                                                                                                                                                                                                                                                                                                                                                                                                                                                                                                                                                                                                                        | 226800  | Advanced | <a href="#">Display Results</a> <a href="#">More</a> |             |
| 7 | 3 and 6                                                                                                                                                                                                                                                                                                                                                                                                                                                                                                                                                                                                                                                       | 1841    | Advanced | <a href="#">Display Results</a> <a href="#">More</a> |             |

**MEDLINE (21.01.2020, 694)**

**Exp Troponin/** OR (Troponin\* OR Troponin Complex\* OR TnT OR TnI OR Cardiac troponin\* OR cTroponin\* OR cTnT OR cTnI OR High sensitive troponin\* OR Hs-TnT OR Hs-TnI OR Hs-Troponin\* OR Hs-cTn\*)

AND

**Exp Chronic Renal Insufficiency/** OR (Chronic Renal Insufficienc\* OR Chronic Kidney Insufficienc\* OR Chronic Kidney Disease\* OR CKD OR Chronic Renal Disease\* OR Chronic Kidney Failure\* OR Chronic Renal Failure\* OR End-stage Kidney Disease\* OR End Stage Kidney Disease\* OR End-Stage Renal Disease\* OR End Stage Renal Disease\* OR ESRD OR Chronic Kidney Disorder\* OR Chronic Nephropathy OR (Chronic Kidney Disease-mineral and bone disorder\*) OR CKD-MBD OR (CKD-mineral and bone disorder\*))

| Ovid®                                               |                                                                                                                                                                                                                                                                                                                                                                                                                                                                                                                                                                                                                                                                                                                                                            |         |          |                      |             | My Account My PayPerView Support & Training Help |  |
|-----------------------------------------------------|------------------------------------------------------------------------------------------------------------------------------------------------------------------------------------------------------------------------------------------------------------------------------------------------------------------------------------------------------------------------------------------------------------------------------------------------------------------------------------------------------------------------------------------------------------------------------------------------------------------------------------------------------------------------------------------------------------------------------------------------------------|---------|----------|----------------------|-------------|--------------------------------------------------|--|
| Search Journals Books Multimedia My Workspace Links |                                                                                                                                                                                                                                                                                                                                                                                                                                                                                                                                                                                                                                                                                                                                                            |         |          |                      |             |                                                  |  |
| ▼ Search History (7)                                |                                                                                                                                                                                                                                                                                                                                                                                                                                                                                                                                                                                                                                                                                                                                                            |         |          |                      |             | View                                             |  |
| #                                                   | Searches                                                                                                                                                                                                                                                                                                                                                                                                                                                                                                                                                                                                                                                                                                                                                   | Results | Type     | Actions              | Annotations |                                                  |  |
| 7                                                   | 3 and 8                                                                                                                                                                                                                                                                                                                                                                                                                                                                                                                                                                                                                                                                                                                                                    | 694     | Advanced | Display Results More |             |                                                  |  |
| 6                                                   | 4 or 5                                                                                                                                                                                                                                                                                                                                                                                                                                                                                                                                                                                                                                                                                                                                                     | 163500  | Advanced | Display Results More |             |                                                  |  |
| 5                                                   | (Chronic Renal Insufficienc* or Chronic Kidney Insufficienc* or Chronic Kidney Disease* or CKD or Chronic Renal Disease* or Chronic Kidney Failure* or Chronic Renal Failure* or End-stage Kidney Disease* or End Stage Kidney Disease* or End-Stage Renal Disease* or End Stage Renal Disease* or ESRD or Chronic Kidney Disorder* or Chronic Nephropathy or (Chronic Kidney Disease-mineral and bone disorder*) or CKD-MBD or (CKD-mineral and bone disorder*)) .mp. [mp=title, abstract, original title, name of substance word, subject heading word, floating sub-heading word, keyword heading word, organism supplementary concept word, protocol supplementary concept word, rare disease supplementary concept word, unique identifier, synonyms] | 113819  | Advanced | Display Results More |             |                                                  |  |
| 4                                                   | exp Renal Insufficiency, Chronic/                                                                                                                                                                                                                                                                                                                                                                                                                                                                                                                                                                                                                                                                                                                          | 111960  | Advanced | Display Results More |             |                                                  |  |
| 3                                                   | 1 or 2                                                                                                                                                                                                                                                                                                                                                                                                                                                                                                                                                                                                                                                                                                                                                     | 31255   | Advanced | Display Results More |             |                                                  |  |
| 2                                                   | (Troponin* or Troponin Complex* or TnT or TnI or Cardiac troponin* or cTroponin* or cTnT or cTnI or High sensitive troponin* or Hs-TnT or Hs-TnI or Hs-Troponin* or Hs-cTn*) .mp. [mp=title, abstract, original title, name of substance word, subject heading word, floating sub-heading word, keyword heading word, organism supplementary concept word, protocol supplementary concept word, rare disease supplementary concept word, unique identifier, synonyms]                                                                                                                                                                                                                                                                                      | 31255   | Advanced | Display Results More |             |                                                  |  |
| 1                                                   | exp Troponin/                                                                                                                                                                                                                                                                                                                                                                                                                                                                                                                                                                                                                                                                                                                                              | 17048   | Advanced | Display Results More |             |                                                  |  |

Cochrane (21.01.2020, 197)

**Exp Troponin/ OR (Troponin\* OR Troponin Complex\* OR TnT OR TnI OR Cardiac troponin\* OR cTroponin\* OR cTnT OR cTnI OR High sensitive troponin\* OR Hs-TnT OR Hs-TnI OR Hs-Troponin\* OR Hs-cTn\*)**

AND

**Exp Chronic Renal Insufficiency/ OR (Chronic Renal Insufficienc\* OR Chronic Kidney Insufficienc\* OR Chronic Kidney Disease\* OR CKD OR Chronic Renal Disease\* OR Chronic Kidney Failure\* OR Chronic Renal Failure\* OR End-stage Kidney Disease\* OR End Stage Kidney Disease\* OR End-Stage Renal Disease\* OR End Stage Renal Disease\* OR ESRD OR Chronic Kidney Disorder\* OR Chronic Nephropathy OR (Chronic Kidney Disease-mineral and bone disorder\*) OR CKD-MBD OR (CKD-mineral and bone disorder\*))**

+

-

+

#1

chronic renal insufficiency

S

MeSH

Limits

3433

-

+

#2

(Chronic Renal Insufficienc\* OR Chronic Kidney Insufficienc\* OR Chronic Kidney Disease\* OR CKD OR Chronic Renal Disease\* OR Chronic Kidney Failure\* OR Chronic Renal Failure\* OR End-stage Kidney Disease\* OR End Stage Kidney Disease\* OR End-Stage Renal Disease\* OR End Stage Renal Disease\* OR ESRD OR Chronic Kidney Disorder\* OR Chronic Nephropathy OR (Chronic Kidney Disease-mineral and bone disorder\*) OR CKD-MBD OR (CKD-mineral and bone disorder\*))

Limits

24858

-

+

#3

#1 OR #2

Limits

24858

-

+

#4

Troponin

Limits

4025

-

+

#5

(Troponin\* OR Troponin Complex\* OR TnT OR TnI OR Cardiac troponin\* OR cTroponin\* OR cTnT OR cTnI OR High sensitive troponin\* OR Hs-TnT OR Hs-TnI OR Hs-Troponin\* OR Hs-cTn\*)

Limits

4487

-

+

#6

#4 OR #5

Limits

4487

-

+

#7

#3 AND #6

Limits

197

-

+

#8

Type a search term or use the S or MeSH buttons to compose

S

MeSH

Limits

N/A

Clear all

Highlight orphan lines

Web of Science (21.01.2020, 1036)

**(Troponin\* OR Troponin Complex\* OR TnT OR TnI OR Cardiac troponin\* OR cTroponin\* OR cTnT OR cTnI OR High sensitive troponin\* OR Hs-TnT OR Hs-TnI OR Hs-Troponin\* OR Hs-cTn\*)**

AND

**(Chronic Renal Insufficienc\* OR Chronic Kidney Insufficienc\* OR Chronic Kidney Disease\* OR CKD OR Chronic Renal Disease\* OR Chronic Kidney Failure\* OR Chronic Renal Failure\* OR End-stage Kidney Disease\* OR End Stage Kidney Disease\* OR End-Stage Renal Disease\* OR End Stage Renal Disease\* OR ESRD OR Chronic Kidney Disorder\* OR Chronic Nephropathy OR (Chronic Kidney Disease-mineral and bone disorder\*) OR CKD-MBD OR (CKD-mineral and bone disorder\*))**

## Search History:

| Set | Results | Save History / Create Alert                                                                                                                                                                                                                                                                                                                                                                                                                                                                                                                                     | Open Saved History | Edit Sets | Combine Sets                                                  | Delete Sets                       |
|-----|---------|-----------------------------------------------------------------------------------------------------------------------------------------------------------------------------------------------------------------------------------------------------------------------------------------------------------------------------------------------------------------------------------------------------------------------------------------------------------------------------------------------------------------------------------------------------------------|--------------------|-----------|---------------------------------------------------------------|-----------------------------------|
|     |         |                                                                                                                                                                                                                                                                                                                                                                                                                                                                                                                                                                 |                    |           | <input type="radio"/> AND <input type="radio"/> OR<br>Combine | Select All<br><div>✖ Delete</div> |
| # 3 | 1,036   | #2 AND #1<br><i>Indexes=SCI-EXPANDED, SSCI, A&amp;HCI, CPCI-S, CPCI-SSH, ESCI Timespan=All years</i>                                                                                                                                                                                                                                                                                                                                                                                                                                                            |                    | Edit      | <input type="checkbox"/>                                      | <input type="checkbox"/>          |
| # 2 | 163,591 | TS=(Chronic Renal Insufficienc* OR Chronic Kidney Insufficienc* OR Chronic Kidney Disease* OR CKD OR Chronic Renal Disease* OR Chronic Kidney Failure* OR Chronic Renal Failure* OR End-stage Kidney Disease* OR End Stage Kidney Disease* OR End-Stage Renal Disease* OR End Stage Renal Disease* OR ESRD OR Chronic Kidney Disorder* OR Chronic Nephropathy OR (Chronic Kidney Disease-mineral and bone disorder*) OR CKD-MBD OR (CKD-mineral and bone disorder*))<br><i>Indexes=SCI-EXPANDED, SSCI, A&amp;HCI, CPCI-S, CPCI-SSH, ESCI Timespan=All years</i> |                    | Edit      | <input type="checkbox"/>                                      | <input type="checkbox"/>          |
| # 1 | 43,893  | TS=(Troponin* OR Troponin Complex* OR TnT OR TnI OR Cardiac troponin* OR cTroponin* OR cTnT OR cTnI OR High sensitive troponin* OR Hs-TnT OR Hs-TnI OR Hs-Troponin* OR Hs-cTn*)<br><i>Indexes=SCI-EXPANDED, SSCI, A&amp;HCI, CPCI-S, CPCI-SSH, ESCI Timespan=All years</i>                                                                                                                                                                                                                                                                                      |                    | Edit      | <input type="checkbox"/>                                      | <input type="checkbox"/>          |
|     |         |                                                                                                                                                                                                                                                                                                                                                                                                                                                                                                                                                                 |                    |           | <input type="radio"/> AND <input type="radio"/> OR<br>Combine | Select All<br><div>✖ Delete</div> |

## PUBMED (21.01.2020, 753)

**Troponin [MeSH Terms] OR (Troponin\* OR Troponin Complex\* OR TnT OR TnI OR Cardiac troponin\* OR cTroponin\* OR cTnT OR cTnI OR High sensitive troponin\* OR Hs-TnT OR Hs-TnI OR Hs-Troponin\* OR Hs-cTn\*)**

## AND

**Chronic Renal Insufficiency [MeSH Terms] OR (Chronic Renal Insufficienc\* OR Chronic Kidney Insufficienc\* OR Chronic Kidney Disease\* OR CKD OR Chronic Renal Disease\* OR Chronic Kidney Failure\* OR Chronic Renal Failure\* OR End-stage Kidney Disease\* OR End Stage Kidney Disease\* OR End-Stage Renal Disease\* OR End Stage Renal Disease\* OR ESRD OR Chronic Kidney Disorder\* OR Chronic Nephropathy OR (Chronic Kidney Disease-mineral and bone disorder\*) OR CKD-MBD OR (CKD-mineral and bone disorder\*))**

## History

[Download history](#) [Clear history](#)

| Search | Add to builder      | Query                                                                                                                                                                                                                                                                                                                                                                                                                                                                                                                    | Items found | Time     |
|--------|---------------------|--------------------------------------------------------------------------------------------------------------------------------------------------------------------------------------------------------------------------------------------------------------------------------------------------------------------------------------------------------------------------------------------------------------------------------------------------------------------------------------------------------------------------|-------------|----------|
| #3     | <a href="#">Add</a> | Search (#1 AND #2)                                                                                                                                                                                                                                                                                                                                                                                                                                                                                                       | 743         | 11:04:06 |
| #2     | <a href="#">Add</a> | Search ((Chronic renal insufficiency [MeSH Terms]) OR (Chronic Renal Insufficienc* OR Chronic Kidney Insufficienc* OR Chronic Kidney Disease* OR CKD OR Chronic Renal Disease* OR Chronic Kidney Failure* OR Chronic Renal Failure* OR End-stage Kidney Disease* OR End Stage Kidney Disease* OR End-Stage Renal Disease* OR End Stage Renal Disease* OR ESRD OR Chronic Kidney Disorder* OR Chronic Nephropathy OR (Chronic Kidney Disease-mineral and bone disorder*) OR CKD-MBD OR (CKD-mineral and bone disorder*))) | 196496      | 11:03:55 |
| #1     | <a href="#">Add</a> | Search ((Troponin [MeSH Terms]) OR (Troponin* OR Troponin Complex* OR TnT OR TnI OR Cardiac troponin* OR cTroponin* OR cTnT OR cTnI OR High sensitive troponin* OR Hs-TnT OR Hs-TnI OR Hs-Troponin* OR Hs-cTn*))                                                                                                                                                                                                                                                                                                         | 31673       | 11:03:19 |
